# Supplementary material
Source: Springer Nature journal article supplement (https://www.springermedizin.de/resource/supplementary/12885_2007_1185_MOESM3_ESM.pdf/9471346)

# MCF7

**IgM**

**27.B1**

**27.F7**

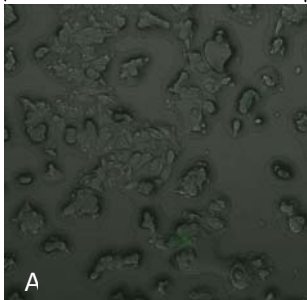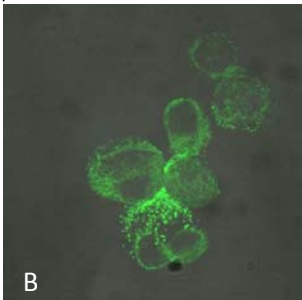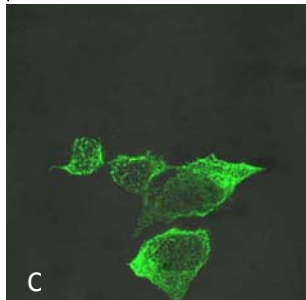

Supplement: MOESM3 [file 9471346]
